# Supplementary material
Source: publisher site journal article supplement (https://static.cambridge.org/content/id/urn:cambridge.org:id:article:S0030605315000241/resource/name/Oryx-14-A-0256_supplementary_material_final.pdf)
Supplement: Supplementary file 1 [file Oryx-14-A-0256_supplementary_material_final.pdf]

## Translocation of problem predators: is it an effective way to mitigate conflict between farmers and cheetahs *Acinonyx jubatus* in Botswana?

LORRAINE K. BOAST, KYLE GOOD and REBECCA KLEIN

TABLE S1 Comments of 129 farmers in Botswana on the translocation of problem predators and its effectiveness in fostering peaceful coexistence on Botswana farmland.

| Comment                                                                                                                                                                                                 | No. |
|---------------------------------------------------------------------------------------------------------------------------------------------------------------------------------------------------------|-----|
| <b>Motivation for translocation</b>                                                                                                                                                                     |     |
| Farmers are not allowed to kill predators; therefore translocation is the only way to deal with problem predators                                                                                       | 5   |
| Remove the problem; stop predation on cattle/game-stock                                                                                                                                                 | 23  |
| Too many predators on farmland; predators should not be on farmland                                                                                                                                     | 4   |
| Better than shooting/killing; it gives the predator a chance to survive                                                                                                                                 | 21  |
| Translocation is good for public relations                                                                                                                                                              | 1   |
| Do not want to translocate, as happy to have predators on farm; do not have many predators                                                                                                              | 26  |
| Happy to have predators if there is a hunting quota                                                                                                                                                     | 3   |
| <b>Effectiveness/limitations</b>                                                                                                                                                                        |     |
| Department of Wildlife & National Parks, or conservation organization refuses to help to translocate a predator; cannot capture yourself; farmers should be allowed to translocate predators themselves | 10  |
| Department of Wildlife & National Parks does not respond quickly; treat the translocated predator inhumanely                                                                                            | 13  |
| Too many predators for translocation to work                                                                                                                                                            | 4   |
| Predators not moved far enough away                                                                                                                                                                     | 8   |
| Nowhere to move predators; territories already full; need to move predator to an area where it will survive                                                                                             | 10  |
| Predators too hard to catch                                                                                                                                                                             | 5   |
| Expensive to translocate                                                                                                                                                                                | 1   |
| <b>Outcome on farm</b>                                                                                                                                                                                  |     |
| Predators come back & continue killing livestock/game-stock                                                                                                                                             | 21  |
| Predators do not return to farm                                                                                                                                                                         | 6   |
| After translocation predators reappear on the farm; do not know whether these are the same individuals that were translocated or different ones                                                         | 6   |
| Another individual moves into the area                                                                                                                                                                  | 9   |
| Stock losses continue by other predator species                                                                                                                                                         | 8   |
| Stock losses or the predator problem increases as a result of translocation                                                                                                                             | 5   |
| Disrupts territory, minimizing destructive behaviour by predators                                                                                                                                       | 1   |
| <b>Outcome for predator</b>                                                                                                                                                                             |     |
| Translocated predators do not survive; shot on farmland or killed by other predators                                                                                                                    | 16  |
| Predators are not collared, therefore their fate is unknown; should be collared                                                                                                                         | 5   |
